# Supplementary material for: Fast and Accurate Determination of Minute Ochratoxin A Levels in Cereal Flours and Wine with the Label-Free White Light Reflectance Spectroscopy Biosensing Platform
Source: MDPI journal article supplement (doi:10.3390/bios12100877), 2022-10-15
Supplement: s1 [file s1]

## Supplementary Information

Article

# Fast and Accurate Determination of Minute Ochratoxin A Levels in Cereal Flours and Wine with the Label-Free White Light Reflectance Spectroscopy Biosensing Platform

Chrysoula-Evangelia Karachaliou <sup>1,\*</sup>, Georgios Koukouvinos <sup>2</sup>, Grigoris Zisis <sup>3</sup>, Dimosthenis Kizis <sup>4</sup>, Evangelia Krystalli <sup>5</sup>, George Siragakis <sup>6</sup>, Dimitris Goustouridis <sup>7</sup>, Sotirios Kakabakos <sup>2</sup>, Panagiota Petrou <sup>2,\*</sup>, Evangelia Livaniou <sup>1</sup> and Ioannis Raptis <sup>3,7</sup>

- <sup>1</sup> Immuno peptide Chemistry Lab, Institute of Nuclear & Radiological Sciences & Technology, Energy & Safety, National Centre for Scientific Research “Demokritos”, P.O. BOX 60037, 15310 Agia Paraskevi, Greece
  - <sup>2</sup> Immunoassay/Immunosensors Lab, Institute of Nuclear & Radiological Sciences & Technology, Energy & Safety, National Centre for Scientific Research “Demokritos”, P.O. BOX 60037, 15310 Agia Paraskevi, Greece
  - <sup>3</sup> Institute of Nanoscience and Nanotechnology, National Centre for Scientific Research “Demokritos”, P.O. BOX 60037, 15310 Agia Paraskevi, Greece
  - <sup>4</sup> Scientific Directorate of Phytopathology, Benaki Phytopathological Institute, 14561 Kifissia, Greece
  - <sup>5</sup> Yiotis Anonimos Emporiki & Viomixaniki Etaireia, 12131 Athens, Greece
  - <sup>6</sup> Tuv Austria Food Allergens Labs Ltd, Kalopsidas 38, 7060 Livadia, Cyprus
  - <sup>7</sup> ThetaMetrisis S.A., Christou Lada 40, 12132 Athens, Greece
- \* Correspondence: xrisak15@hotmail.com (C.-E.K.); ypetrou@rrp.demokritos.gr (P.P.)

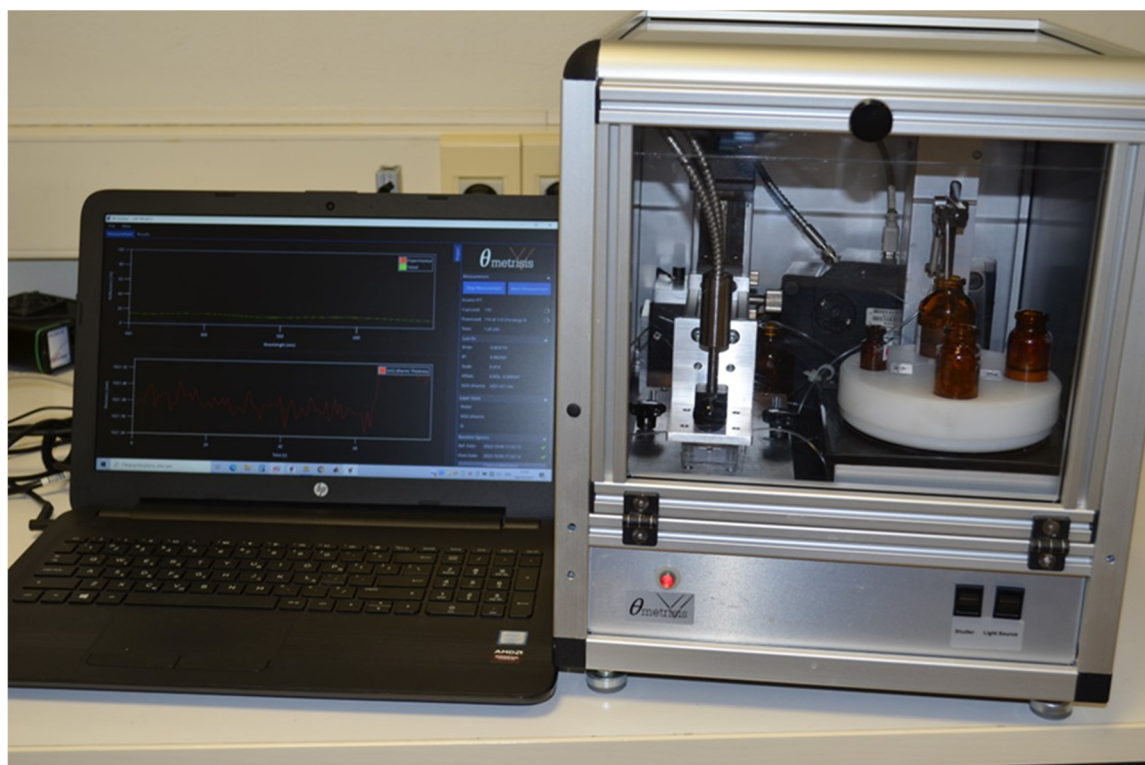

**Figure S1.** Picture of the WLRS instrument set-up used for OTA determination.

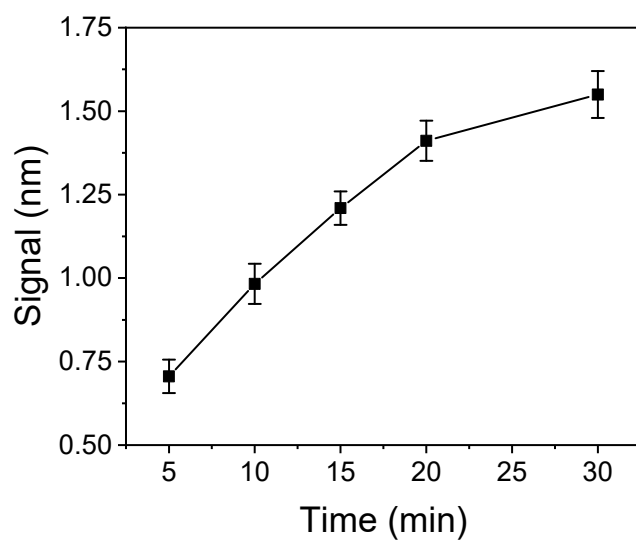

**Figure S2.** Effect of primary immunoreaction duration to zero calibrator signals obtained for a 10-min secondary immunoreaction and 3-min reaction with streptavidin. Each point is the mean of three measurements  $\pm$  SD.

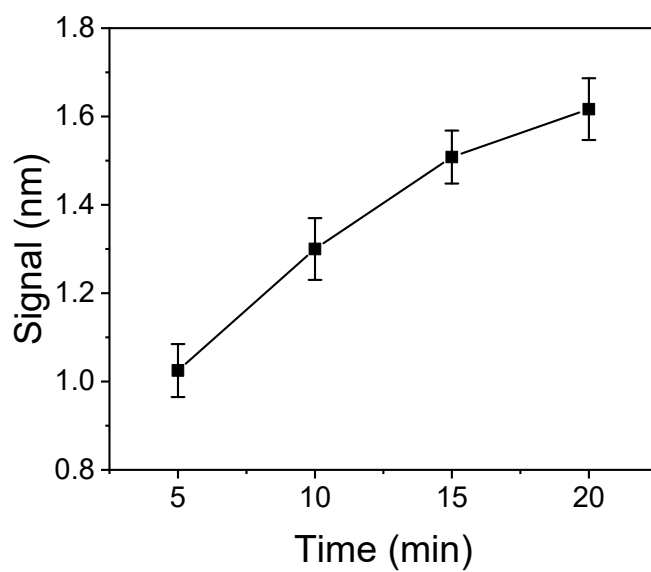

**Figure S3.** Effect of secondary immunoreaction duration to zero calibrator signals obtained for a 30-min primary immunoreaction and 3-min reaction with streptavidin. Each point is the mean of three measurements  $\pm$  SD.

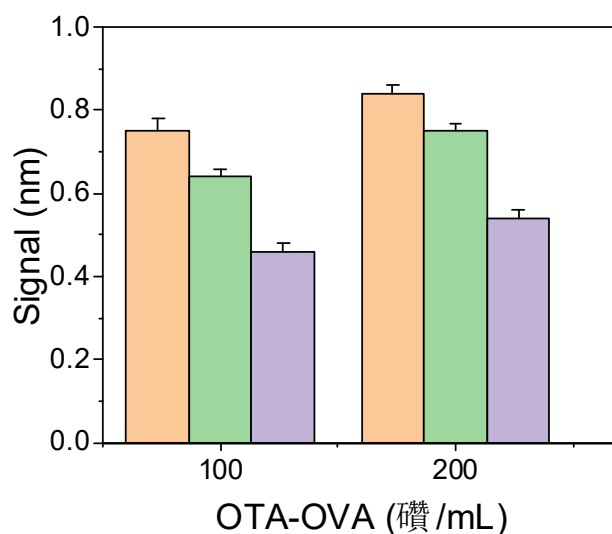

**Figure S4.** Effect of OTA-OVA conjugate concentration on the signal values obtained for calibrators containing 1.0 (green columns) and 50 ng/mL OTA (purple columns) with respect to zero calibrator (orange columns). The anti-OTA antibody concentration was 1  $\mu$ g/mL. Each point is the mean value of three measurements  $\pm$  SD.

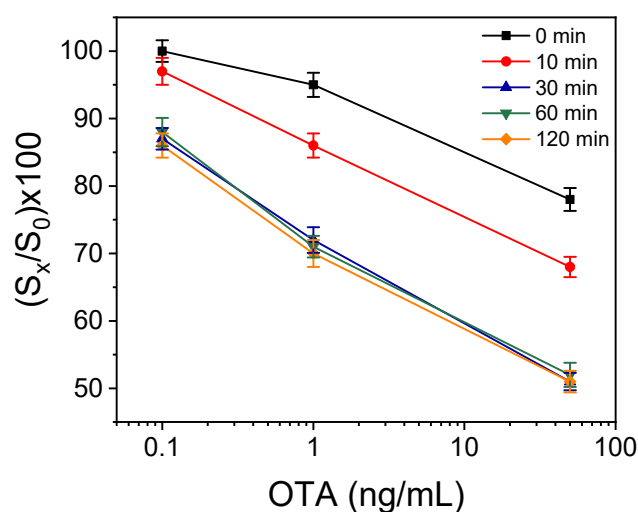

**Figure S5.** Effect of pre-incubation of anti-OTA antibody with OTA calibrators on assay sensitivity. Calibration curves obtained when the mixtures of the anti-OTA antibody with OTA calibrators were pre-incubated for 10 (red circles), 30 (blue up triangles), 60 (green down triangles) or 120 min (orange diamond). The calibration curve obtained without pre-incubation is also included (black squares). Each point is the mean value of three measurements  $\pm$  SD.

**Table S1.** Zero calibrator signal values obtained from 12 measurements for the determination of SD and, consequently, assay LoD and LoQ.

| Assay buffer | S <sub>0</sub> (nm) |
|--------------|---------------------|
| Run 1        | 0.85                |
| Run 2        | 0.82                |
| Run 3        | 0.81                |
| Run 4        | 0.81                |
| Run 5        | 0.84                |

|                     |                                |
|---------------------|--------------------------------|
| Run 6               | 0.81                           |
| Run 7               | 0.82                           |
| Run 8               | 0.81                           |
| Run 9               | 0.85                           |
| Run 10              | 0.84                           |
| Run 11              | 0.85                           |
| Run 12              | 0.85                           |
| Mean value $\pm$ SD | $0.83 \pm 0.02$ ( $\pm 2.2$ %) |

**Table S2.** Zero calibrator signal values obtained from 8 wheat flour, 3 corn starch and 3 corn flour samples after extraction and 2-fold dilution.

| Cereal flour        | S <sub>0</sub> (nm) |
|---------------------|---------------------|
| Wheat flour 1       | 0.84                |
| Wheat flour 2       | 0.84                |
| Wheat flour 3       | 0.82                |
| Wheat flour 4       | 0.84                |
| Whole wheat flour 1 | 0.82                |
| Whole wheat flour 2 | 0.83                |
| Whole wheat flour 3 | 0.83                |
| Whole wheat flour 4 | 0.84                |
| Corn starch 1       | 0.85                |
| Corn starch 2       | 0.85                |
| Corn starch 3       | 0.82                |
| Corn flour 1        | 0.84                |
| Corn flour 2        | 0.83                |
| Corn flour 3        | 0.83                |
| Mean value $\pm$ SD | $0.83 \pm 0.01$     |

**Table S3.** Zero calibrator signal values obtained from 6 white wines and 6 red wines after 10-times dilution.

| Grape Variety       | S <sub>0</sub> (nm) |
|---------------------|---------------------|
| Savatiano 1         | 0.85                |
| Savatiano 2         | 0.83                |
| Moschofilero 1      | 0.82                |
| Moschofilero 2      | 0.84                |
| Assyrtiko 1         | 0.84                |
| Assyrtiko 2         | 0.85                |
| Xinomavro 1         | 0.83                |
| Xinomavro 2         | 0.83                |
| Merlot 1            | 0.82                |
| Merlot 2            | 0.83                |
| Syrah 1             | 0.85                |
| Syrah 2             | 0.83                |
| Mean value $\pm$ SD | $0.84 \pm 0.01$     |

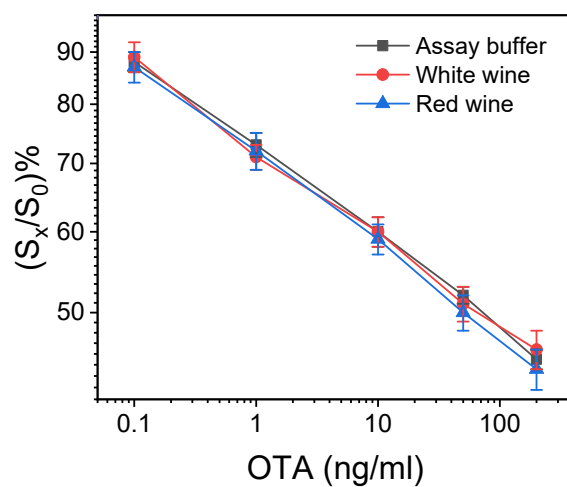

**Figure S6.** Calibration curves obtained with OTA calibrators prepared in assay buffer (black squares), white wine treated and 10-times diluted (red circles) or red wine treated and 10-times diluted (blue triangles). Each point is the mean value of three measurements  $\pm$  SD.
